# Supplementary material for: The Lin28/let-7 axis is critical for myelination in the peripheral nervous system
Source: PubMed Central journal article supplement (PMC4634210; doi:10.1038/ncomms9584), 2015-10-14
Supplement: ncomms9584-s1.pdf [file ncomms9584-s1.pdf]

# Supplementary Information

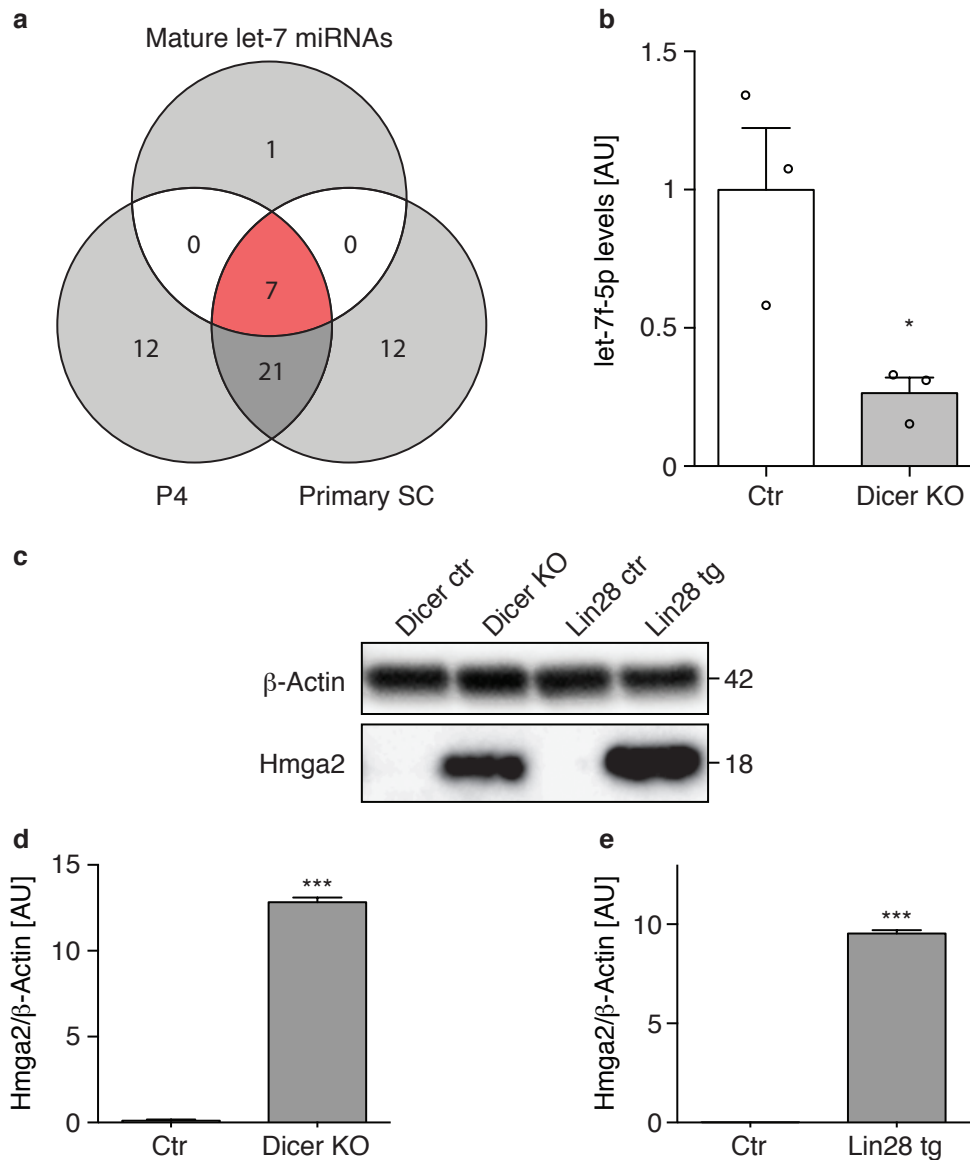

**Supplementary Figure 1.** Small RNA sequencing of cultured differentiated SCs and Hmga2 protein expression analysis. **(a)** Venn diagram showing the common presence of most let-7 family members (annotated in mm9) among the 40 most enriched miRNAs in P4 wild-type (corrected for P4 Dicer expressed miRNAs) and in cultured differentiated SCs. **(b)** Levels of mature let-7f-5p in P4 Dicer KO and controls, normalized to snoRNA-202 (n = 3 mice per condition). **(c)** Immunoblot of Hmga2 from P5 SN of Dicer KO, Lin28 tg and their respective controls.  $\beta$ -Actin serves as loading control. Numbers refer to estimated apparent molecular weights [kDa]. **(d,e)** Quantification of protein levels of Hmga2 in P5 Dicer KO and Lin28 tg normalized to  $\beta$ -Actin levels (n = 6 mice per condition). Error bars: s.e.m., two-sided two-sample Student's t-test \*P < 0.05, \*\*P < 0.01, \*\*\*P < 0.001 **(b,d,e)**.

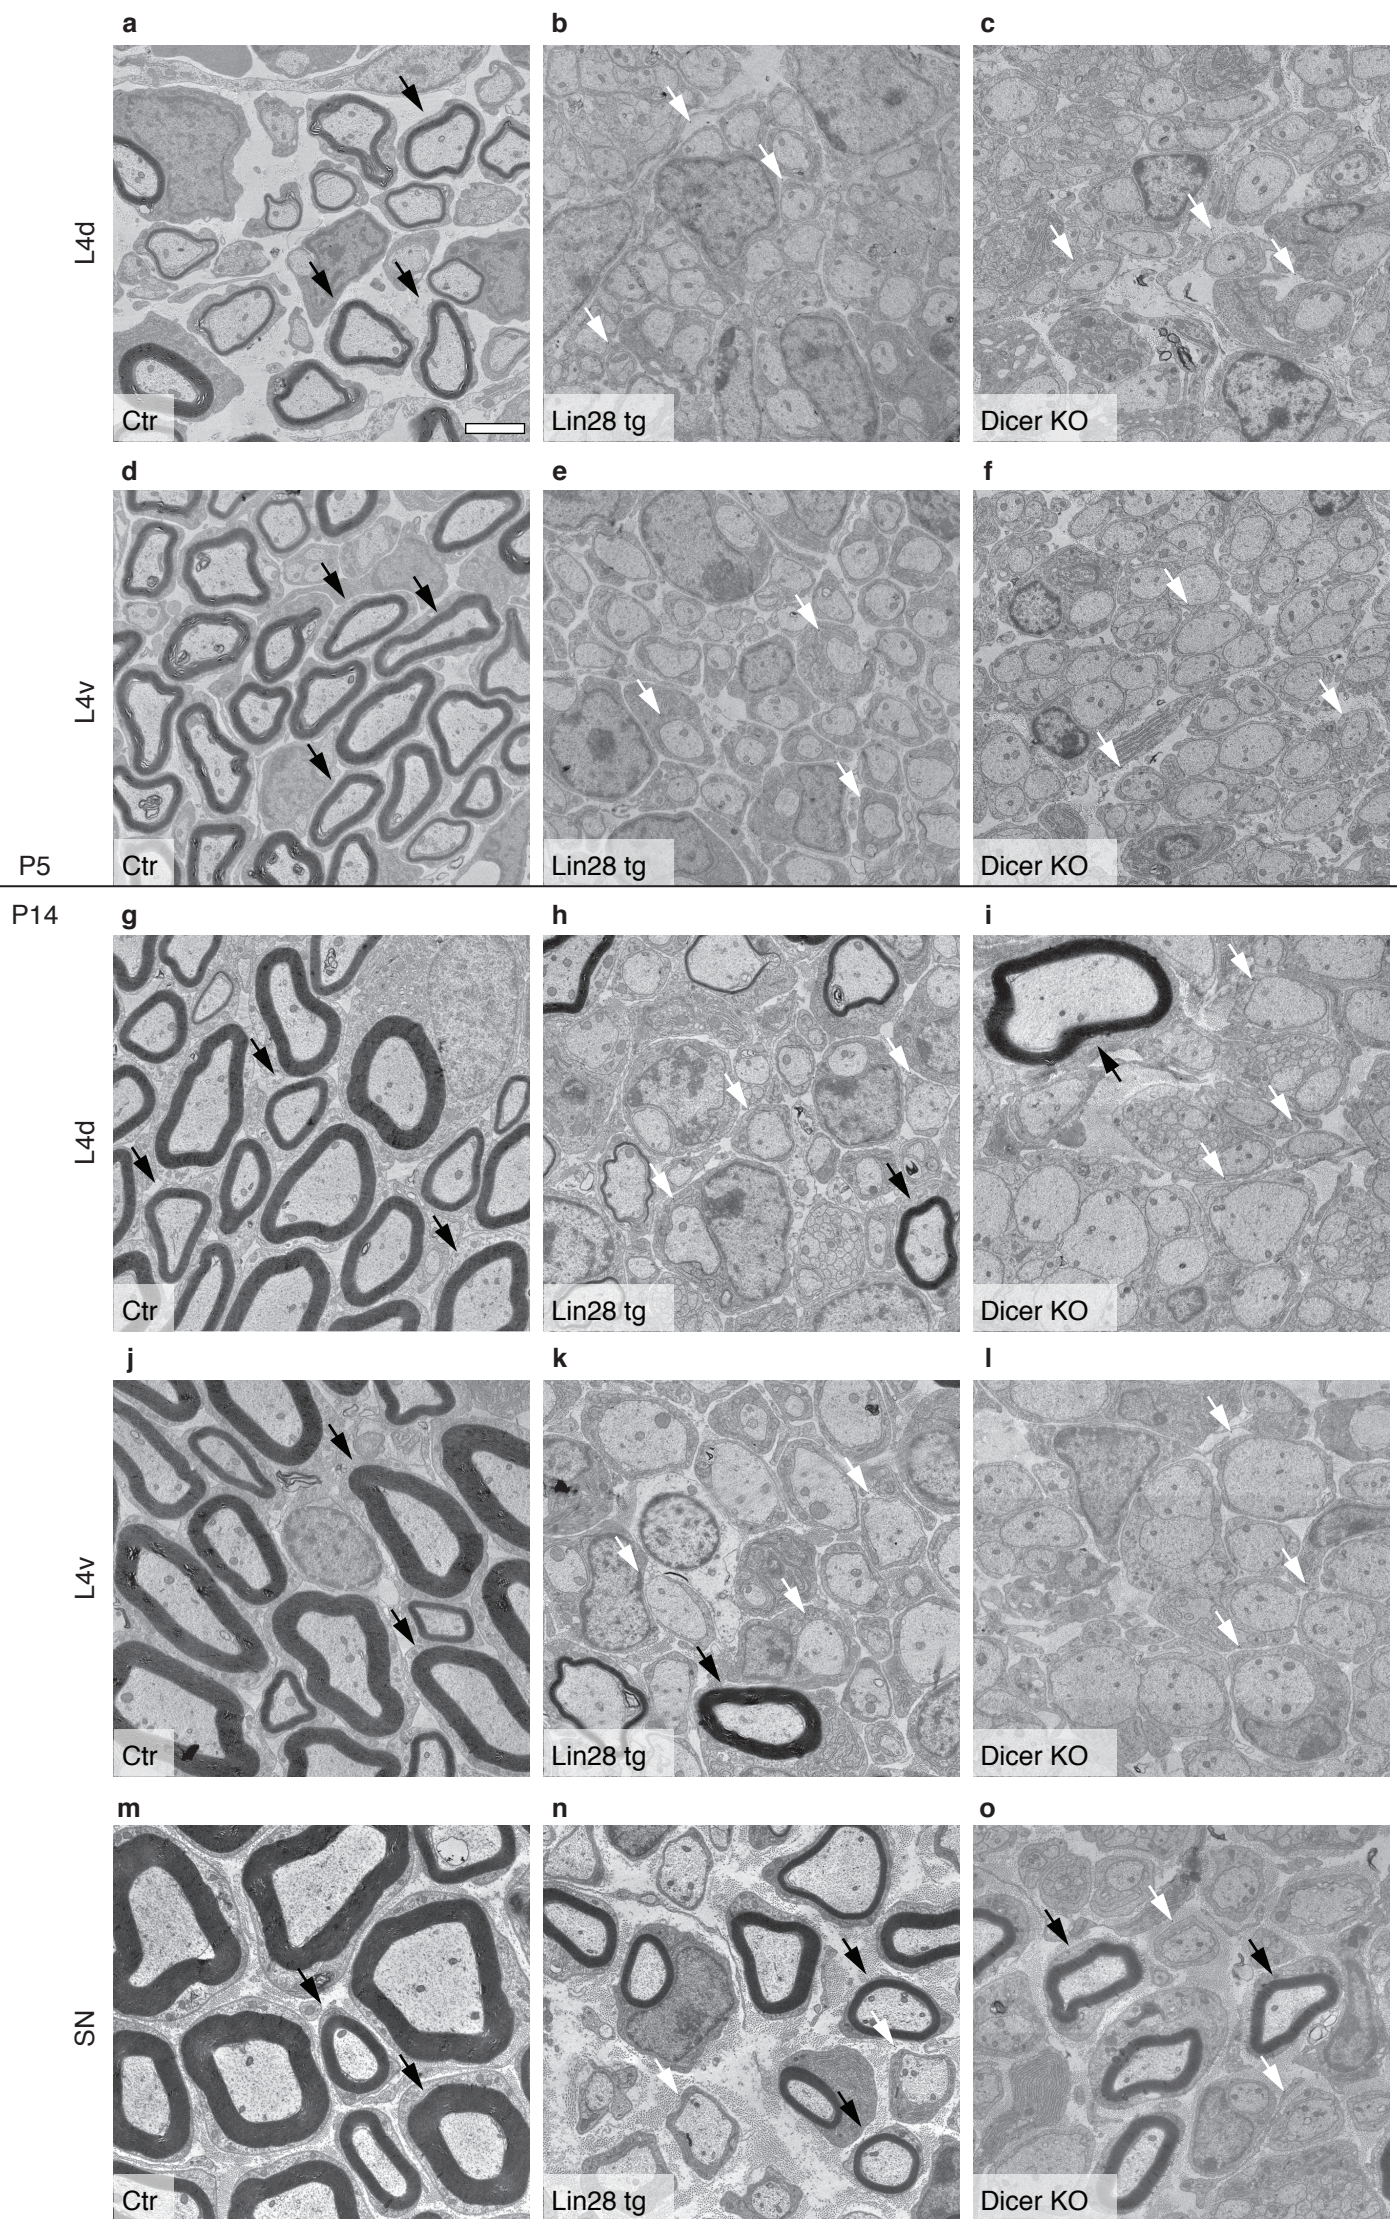

**Supplementary Figure 2.** Morphological analysis of Lin28 tg at P5 and P14. **(a-f)** Electron micrographs of Lin28 tg, Dicer KO and controls from dorsal (L4d, **a-c**) and ventral (L4v, **d-f**) lumbar 4 roots at P5. **(g-o)** Electron micrographs of Lin28 tg, Dicer KO and controls at P14 from L4d (**g-i**), L4v (**j-l**) and SN (**m-o**); Myelinated axons (black arrows) and axons at the pro-myelinating stage (white arrows) are highlighted. Images are representatives from at least 3 mice per condition. Scale bar = 2  $\mu\text{m}$  (**a-o**).

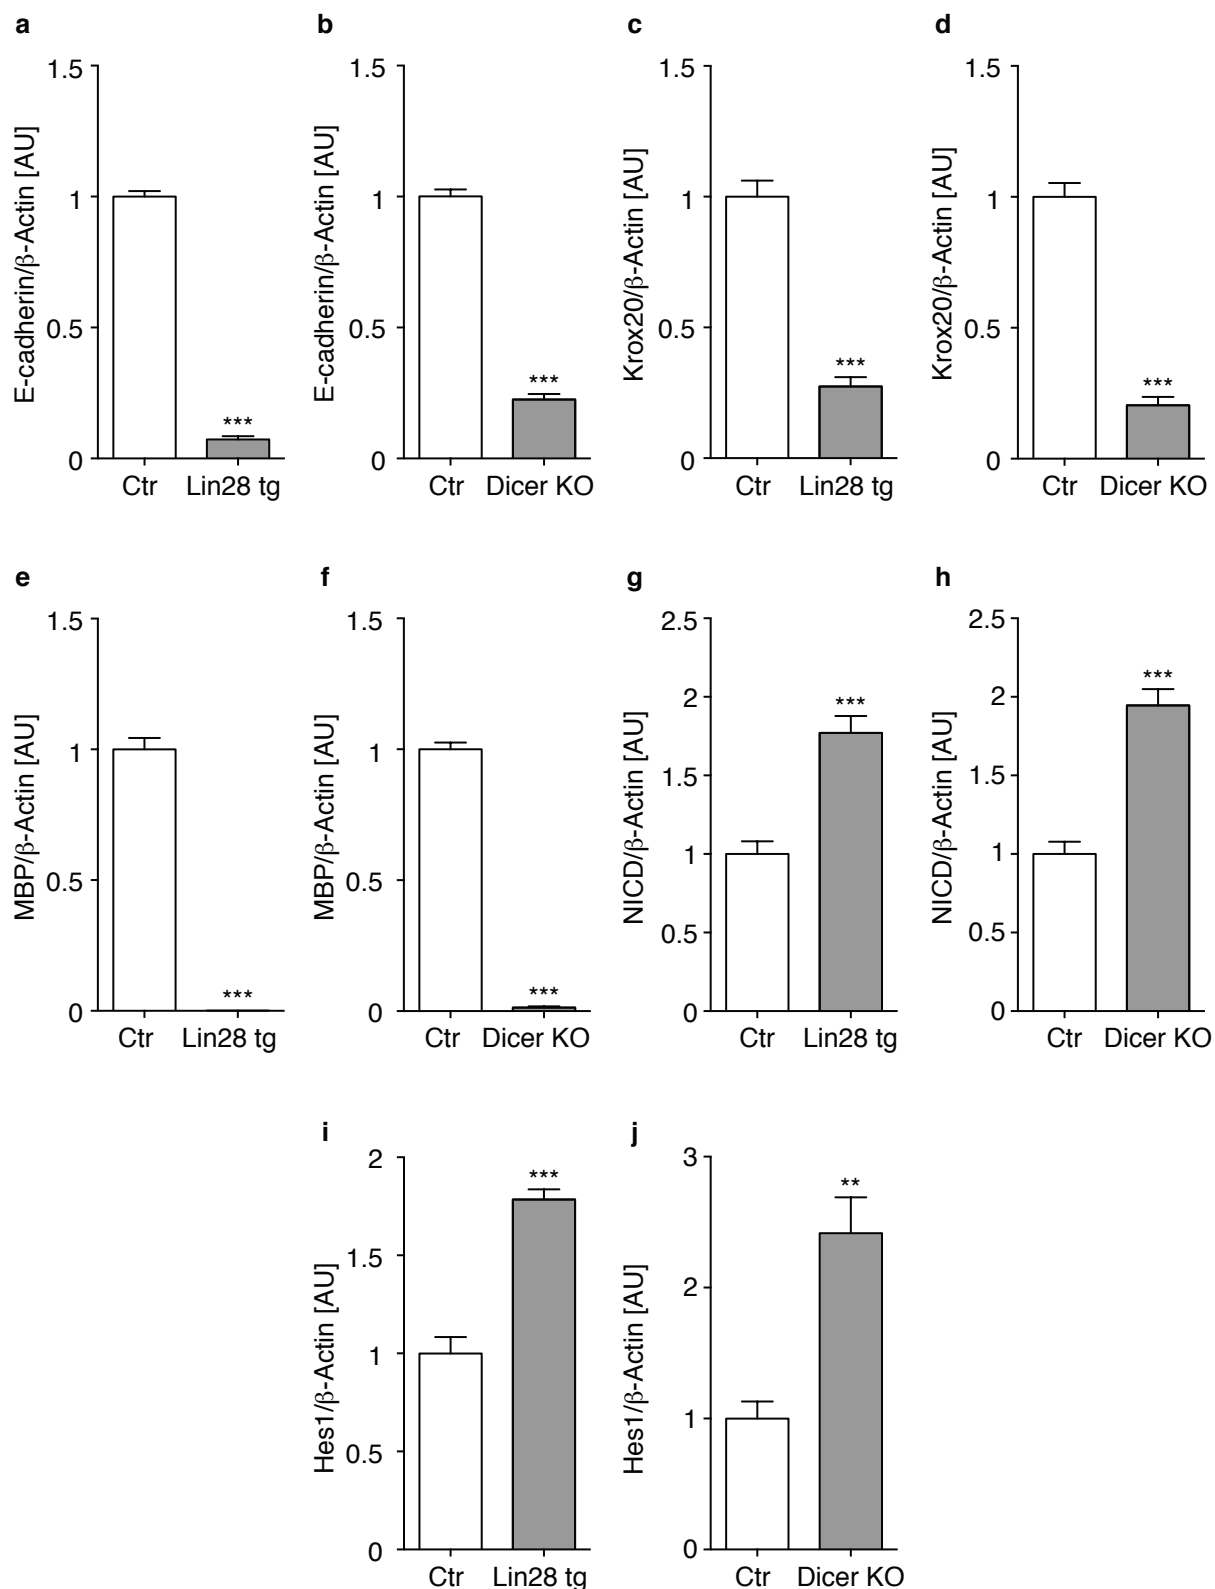

**Supplementary Figure 3.** Quantification of immunoblots. **(a-j)** Quantification of protein levels of E-cadherin in P5 Lin28 tg and Dicer KO **(a,b)**, Krox20 in P5 Lin28 tg and Dicer KO **(c,d)**, MBP in P5 Lin28 tg and Dicer KO **(e,f)**, NICD in P5 Lin28 tg and Dicer KO **(g,h)** and Hes1 in P5 Lin28 tg and Dicer KO **(i,j)**, with their respective controls. Levels were normalized to  $\beta$ -Actin levels. Six **(a-i)** and nine **(j)** mice were analysed for each condition. Error bars: s.e.m. Two-sided two-sample Student's t-test \* $P < 0.05$ , \*\* $P < 0.01$ , \*\*\* $P < 0.001$  **(a-j)**.

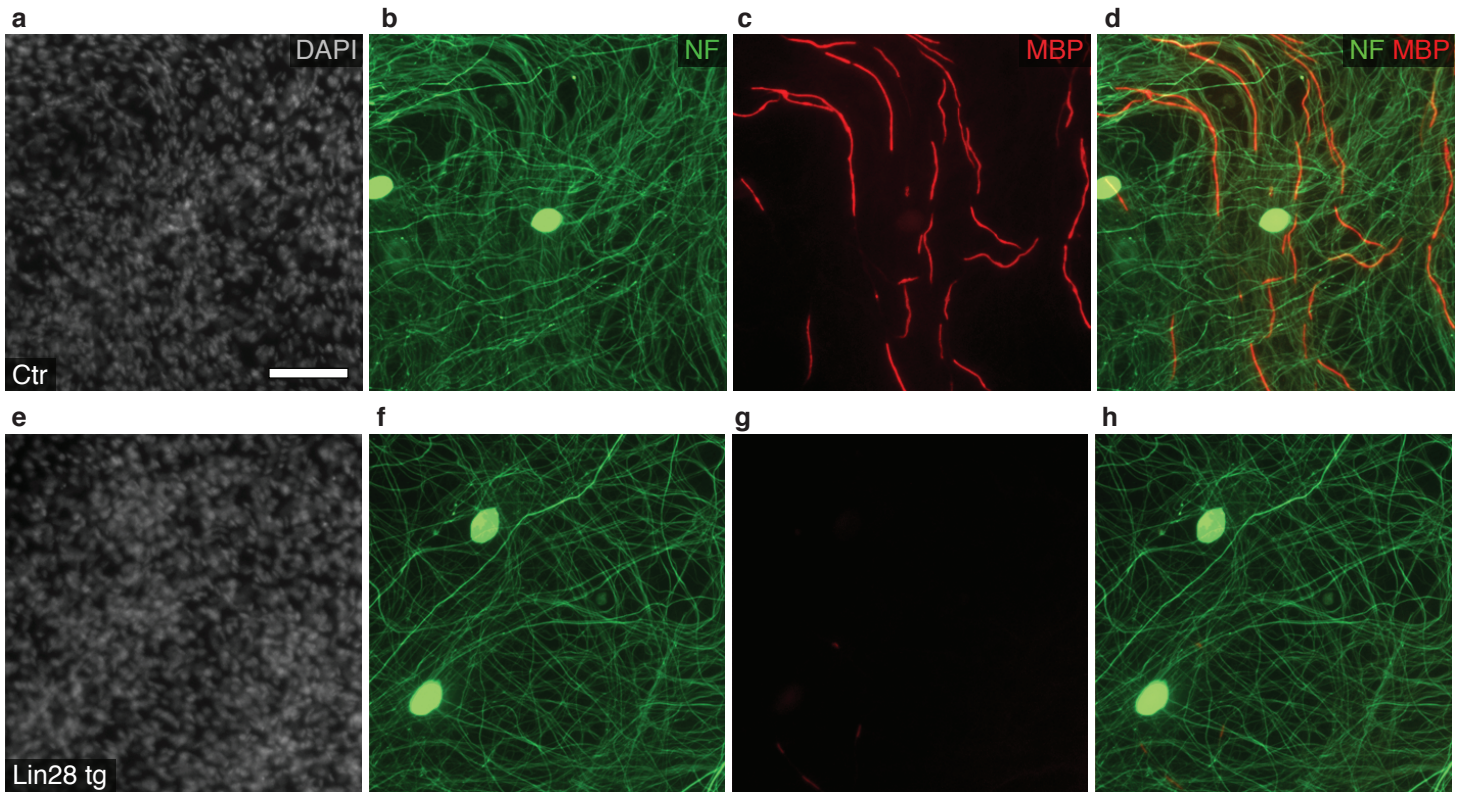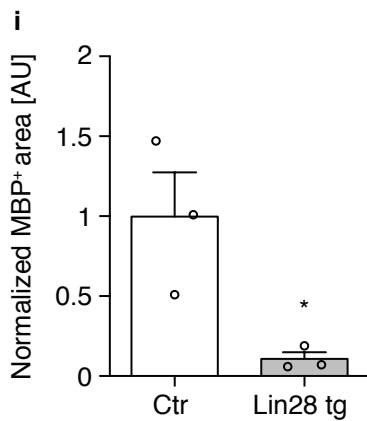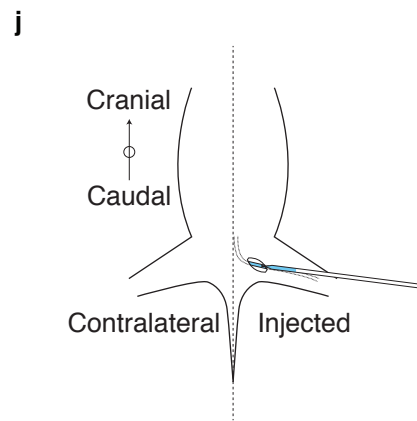

**Supplementary Figure 4.** Myelination is suppressed in Lin28 tg DRG explant cultures. **(a-h)** Dissociated DRG explants from Lin28 tg and controls immunostained for NF (green) and MBP (red). Nuclei were stained with DAPI (blue, false coloured in white). **(i)** Quantification of MBP<sup>+</sup> area in Lin28 tg and controls (Ctr) after normalization to NF<sup>+</sup> area (n = 3 embryos per condition). **(j)** Scheme of injection of lentivirus into SN; Scale bar = 100  $\mu$ m **(a-h)**; Error bars: s.e.m. two-sided two-sample Student's t-test \*P < 0.05 **(i)**.

**Fig. 2h**

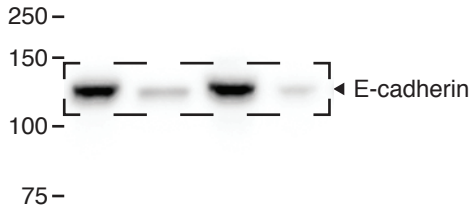

**Fig. 2h**

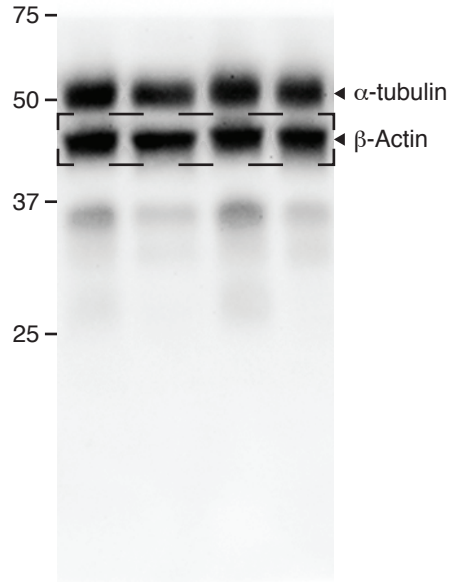

**Fig. 2j**

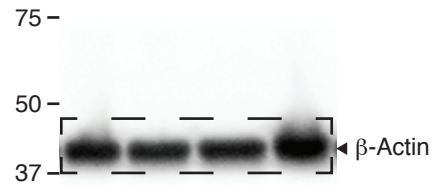

**Fig. 2j**

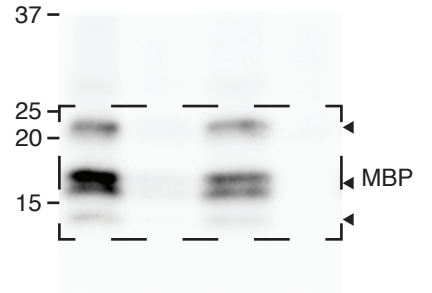

**Fig. 2i**

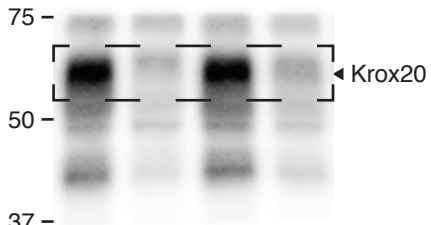

**Fig. 2i**

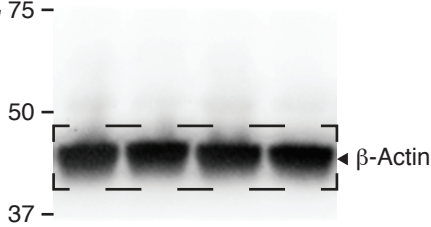

**Fig. 4d**

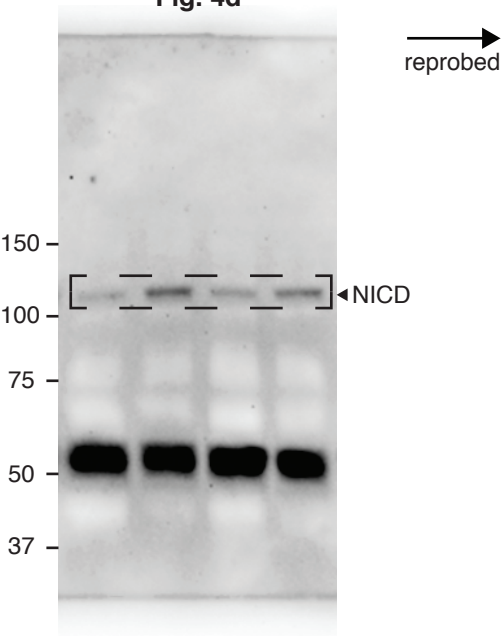

**Fig. 4d**

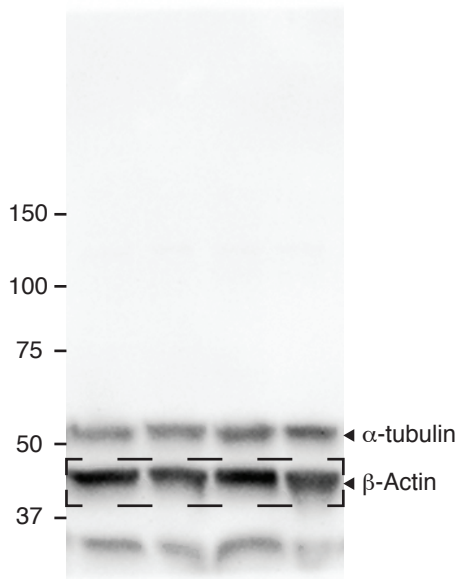

**Fig. 4e**

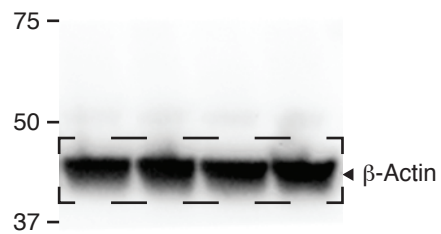

**Fig. 4e**

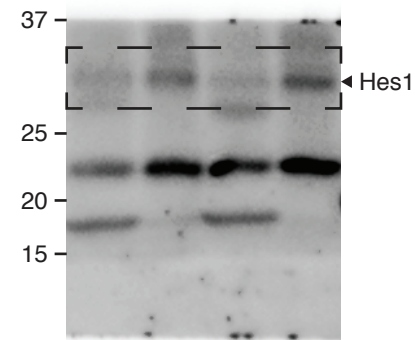

**Supplementary Fig. 1c**

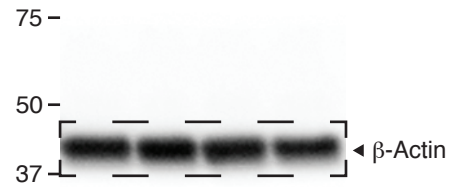

**Supplementary Fig. 1c**

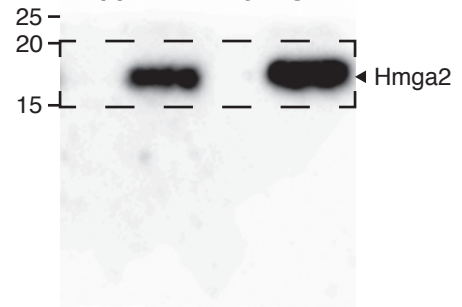

**Supplementary Figure 5.** Uncropped immunoblots displayed in manuscript. Cropped and quantified regions are highlighted (dashed boxes). After transfer, membranes were cut as follows: Fig. 2h (2 pieces, cut at 75 kDa). Fig. 2j (3 pieces, cut at 37 kDa and 75 kDa). Fig. 2i (3 pieces, cut at 37 kDa and 75 kDa). Fig. 4d (2 pieces, cut at 30 kDa). Fig. 4e (3 pieces, cut at 37 kDa and 75 kDa). Supplementary Fig. 1c (4 pieces, cut at 25 kDa, 37 kDa and 75 kDa). Pieces not shown were used for unrelated probing. SDS polyacrylamide gels were used as 4-15% gradient gels (Fig. 2j, Supplementary Fig. 1c) and 10% gels (Figs. 2h, 2i, 4d, 4e). Numbers refer to molecular weight size markers [kDa].

**Supplementary Table 1.** List of nucleotides.

| Name          | Species     | Sequence (5'-3')                                                                                                                                 |
|---------------|-------------|--------------------------------------------------------------------------------------------------------------------------------------------------|
| GAPDH_F       | mouse       | GGTGAAGGTCGGTGTGAACGGATTTGG                                                                                                                      |
| GAPDH_R       | mouse       | GGTCAATGAAGGGGTCGTTGATGGCAAC                                                                                                                     |
| Lin28A_qPCR_F | mouse       | GGCATCTGTAAGTGGTTCAACG                                                                                                                           |
| Lin28A_qPCR_R | mouse       | GCCAGTGACACGGATGGATT                                                                                                                             |
| Lin28B_qPCR_F | mouse       | AACGTGCGCATGGGATTCGG                                                                                                                             |
| Lin28B_qPCR_R | mouse       | TGACTCAAGGCCTTTGGGGGAT                                                                                                                           |
| Hmga2_qPCR_F  | mouse       | CAGCAAAAACAAGAGCCCCTC                                                                                                                            |
| Hmga2_qPCR_R  | mouse       | CGACTTGTGTGGCCATTTC                                                                                                                              |
| Hes1_qPCR_F   | rat & mouse | CTACCCAGCCAGTGTCAACACGAC                                                                                                                         |
| Hes1_qPCR_R   | rat & mouse | AGCTTGGAATGCCGGGAGCTATCTTTC                                                                                                                      |
| Krox20_qPCR_F | rat & mouse | ACAGCCTCTACCCGGTGGAAGAC                                                                                                                          |
| Krox20_qPCR_R | rat & mouse | CAGAGATGGGAGCGAAGCTACTCGGATA                                                                                                                     |
| Notch1_qPCR_F | rat & mouse | TCCACAGGCTGGCAAGGTCAAAC                                                                                                                          |
| Notch1_qPCR_R | rat & mouse | AGCGGTAGCTGCCATTGGTGTCTG                                                                                                                         |
| Notch1_UTR_F  | mouse       | TTATTTTCAGTGCTGGGTGGCCC                                                                                                                          |
| Notch1_UTR_R  | mouse       | CGTCCCAGATCACCCACATTCC                                                                                                                           |
| let7f_TuD_F   | mouse       | TGACGGCGCTAGGATCATCAACAATAACAATCATCTT<br>ACTACCTCACAAGTATTCTGGTCACAGAATACAACA<br>ATAACAATCATCTTACTACCTCACAAGATGATCCTAGCGC<br>CGTCTTTTTTC         |
| let7f_TuD_R   | mouse       | TCGAGAAAAAAGACGGCGCTAGGATCATCTTGTGAGGT<br>AGTAAGATGATTGTATAGTTGTTGTATTCTGTGACCAGA<br>ATACTTGTGAGGTAGTAAGATGATTGTATAGTTGTTGAT<br>GATCCTAGCGCCGTCA |
| anti-let-7    | mouse       | AACUAUACAUAUCUACUACCUCA                                                                                                                          |
| anti-Ctr      | mouse       | UCAACAUCAGUCUGAUAAGCUA                                                                                                                           |
