# Supplementary material for: The Lin28/let-7 axis is critical for myelination in the peripheral nervous system
Source: PubMed Central journal article supplement (PMC4634210; doi:10.1038/ncomms9584), 2015-10-14
Supplement: ncomms9584-s2.pdf [file ncomms9584-s2.pdf]

**Supplementary Data 1.** Predicted interactions of let-7 with the Notch1 3'-UTR using RNAhybrid.

dataset: 1  
**TARGET : mm\_Notch1\_3UTR**  
length: 1628  
**MIRNA : mmu-let-7f-5p**  
length: 22

mfe: -21.5 kcal/mol  
p-value: undefined

**position 766**  
target 5' A C GG G G C 3'  
AGC AUGCA GU UG UGCCUC  
UUG UAUGU UA AU AUGGAG  
miRNA 3' A G G U 5'

dataset: 1  
**TARGET : mm\_Notch1\_3UTR**  
length: 1628  
**MIRNA : mmu-let-7f-5p**  
length: 22

mfe: -17.8 kcal/mol  
p-value: undefined

**position 163**  
target 5' A UUUU UCCACAGAAAC U 3'  
UGUAC AUUU ACUGCCUU  
AUAUG UAGA UGAUGGAG  
miRNA 3' UUG U U 5'

dataset: 1  
**TARGET : mm\_Notch1\_3UTR**  
length: 1628  
**MIRNA : mmu-let-7f-5p**  
length: 22

mfe: -17.1 kcal/mol  
p-value: undefined

**position 345**  
target 5' U UU UGAU U 3'  
GCUGU AUUUUAU UGCUUC  
UGAUA UAGAUG AUGGAG  
miRNA 3' U UGU U 5'

dataset: 1  
**TARGET : mm\_Notch1\_3UTR**  
length: 1628  
**MIRNA : mmu-let-7f-5p**  
length: 22

mfe: -17.0 kcal/mol  
p-value: undefined

**position 43**  
target 5' C UG AGUCCUU C G G 3'  
CUGU GG UC A UGCUUCA  
GAUA UU AG U AUGGAGU  
miRNA 3' UU UG A G 5'

dataset: 1  
**TARGET : mm\_Notch1\_3UTR**  
length: 1628  
**MIRNA : mmu-let-7f-5p**  
length: 22

mfe: -15.2 kcal/mol  
p-value: undefined

**position 1020**  
target 5' U G UGG G GGUGGAGC U 3'  
GA UGUGC AAU UG CUGCUUC  
UU AUAUG UUA AU GAUGGAG  
miRNA 3' G G U 5'

dataset: 1  
**TARGET : mm\_Notch1\_3UTR**  
length: 1628  
**MIRNA : mmu-let-7f-5p**  
length: 22

mfe: -14.5 kcal/mol  
p-value: undefined

**position 690**  
target 5' A GU GGGCCUUGGGAG U 3'  
GUA GUUUAU UACUUC  
UAU UAGAUG AUGGAG  
miRNA 3' UUGA GU U 5'

dataset: 1  
**TARGET : mm\_Notch1\_3UTR**  
length: 1628

**MIRNA : mmu-let-7f-5p**

length: 22

mfe: -9.9 kcal/mol

p-value: undefined

**position 1532**

```
target 5' A      GG      GA AAUGAUG      U 3'
          AACUGUA  UAAU  A      UAUUUU
          UUGAUAU  GUUA  U      AUGGAG
miRNA  3'                GA G                U 5'
```

dataset: 1

**TARGET : mm\_Notch1\_3UTR**

length: 1628

**MIRNA : mmu-let-7f-5p**

length: 22

mfe: -8.7 kcal/mol

p-value: undefined

**position 200**

```
target 5' U                        C 3'
          UUAUAUG      UAUUGUUUU
          GAUAUGU      AUGAUGGAG
miRNA  3' UU          UAG          U 5'
```

dataset: 1

**TARGET : mm\_Notch1\_3UTR**

length: 1628

**MIRNA : mmu-let-7f-5p**

length: 22

mfe: -7.3 kcal/mol

p-value: undefined

**position 74**

```
target 5' U      GG      CCAAAGGAGCCU      AAAAA      U 3'
          GCUG  GCGA      UUUA      UGUUUU
          UGAU  UGUU      AGAU      AUGGAG
miRNA  3' U      A                        G                U 5'
```

dataset: 1

**TARGET : mm\_Notch1\_3UTR**

length: 1628

**MIRNA : mmu-let-7f-5p**

length: 22

mfe: 0.0 kcal/mol  
p-value: undefined

**position 0**  
target 5' 3'

miRNA 3' 5'

dataset: 1  
**TARGET : mm\_Notch1\_3UTR**  
length: 1628  
**MIRNA : mmu-let-7g-5p**  
length: 22

mfe: -20.7 kcal/mol  
p-value: undefined

**position 163**  
target 5' A UUUUAUUUCCACAG U 3'  
UGUAC AAAC ACUGCCUU  
ACAUG UUUG UGAUGGAG  
miRNA 3' UUG A U 5'

dataset: 1  
**TARGET : mm\_Notch1\_3UTR**  
length: 1628  
**MIRNA : mmu-let-7g-5p**  
length: 22

mfe: -19.6 kcal/mol  
p-value: undefined

**position 771**  
target 5' A GG UG G C 3'  
UGCA G UG UGCCUC  
AUGU U AU AUGGAG  
miRNA 3' UUGAC UG G U 5'

dataset: 1  
**TARGET : mm\_Notch1\_3UTR**  
length: 1628  
**MIRNA : mmu-let-7g-5p**  
length: 22

mfe: -19.3 kcal/mol  
p-value: undefined

**position 43**

```
target 5' C      UG  G CCUUUCC G          G 3'
          CUGU  GGA U          A UGCUUCA
          GACA  UUU A          U AUGGAGU
miRNA 3' UU      UG  G          G          5'
```

dataset: 1

**TARGET : mm\_Notch1\_3UTR**

length: 1628

**MIRNA : mmu-let-7g-5p**

length: 22

mfe: -18.5 kcal/mol

p-value: undefined

**position 1005**

```
target 5'      G  G  A          G 3'
          GUG GGAC  UGCCUU
          CAU UUUG  AUGGAG
miRNA 3' UUGA  G  AUG          U 5'
```

dataset: 1

**TARGET : mm\_Notch1\_3UTR**

length: 1628

**MIRNA : mmu-let-7g-5p**

length: 22

mfe: -18.3 kcal/mol

p-value: undefined

**position 345**

```
target 5' U      UU  UU  G          U 3'
          GCUGU  AU  AUU AUUGCUUC
          UGACA  UG  UGA UGAUGGAG
miRNA 3' U          UU          U 5'
```

dataset: 1

**TARGET : mm\_Notch1\_3UTR**

length: 1628

**MIRNA : mmu-let-7g-5p**

length: 22

mfe: -18.1 kcal/mol

p-value: undefined

**position 1020**

```
target 5' U  G      UGG  UG  GGUGGAGC          U 3'
          GA UGUGC  AA  UG          CUGCUUC
```

miRNA 3' UU ACAUG UU AU GAUGGAG U 5'

dataset: 1  
**TARGET : mm\_Notch1\_3UTR**  
length: 1628  
**MIRNA : mmu-let-7g-5p**  
length: 22

mfe: -15.0 kcal/mol  
p-value: undefined

**position 685**  
target 5' U G UG UUAUGGGCCUUGGG G U 3'  
CUGUA UAG U A UACUUC  
GACAU GUU A U AUGGAG  
miRNA 3' UU UG G U 5'

dataset: 1  
**TARGET : mm\_Notch1\_3UTR**  
length: 1628  
**MIRNA : mmu-let-7g-5p**  
length: 22

mfe: -12.1 kcal/mol  
p-value: undefined

**position 1532**  
target 5' A GGUAAUGA GAUG U 3'  
AACUGUA AAAU UAUUUU  
UUGACAU UUUG AUGGAG  
miRNA 3' G AUG U 5'

dataset: 1  
**TARGET : mm\_Notch1\_3UTR**  
length: 1628  
**MIRNA : mmu-let-7g-5p**  
length: 22

mfe: -8.9 kcal/mol  
p-value: undefined

**position 197**  
target 5' U UUAU UG C 3'  
UAU A UAUUGUUUU  
AUG U AUGAUGGAG  
miRNA 3' UUGAC U UG U 5'

dataset: 1  
**TARGET : mm\_Notch1\_3UTR**  
length: 1628  
**MIRNA : mmu-let-7g-5p**  
length: 22

mfe: -6.6 kcal/mol  
p-value: undefined

**position 74**

```
target 5' U   GG   CCAA GA  CUUUUAAAAAA   U 3'
          GCUG GCGA   G  GC           UGUUUU
          UGAC UGUU   U  UG           AUGGAG
miRNA  3' U   A           GA           U 5'
```

dataset: 1  
**TARGET : mm\_Notch1\_3UTR**  
length: 1628  
**MIRNA : mmu-let-7g-5p**  
length: 22

mfe: 0.0 kcal/mol  
p-value: undefined

**position 0**

```
target 5' 3'
```

```
miRNA 3' 5'
```

dataset: 1  
**TARGET : mm\_Notch1\_3UTR**  
length: 1628  
**MIRNA : mmu-let-7i-5p**  
length: 22

mfe: -24.2 kcal/mol  
p-value: undefined

**position 766**

```
target 5' A   CAU   G  UG  G   C 3'
          AGC   GCA GG  UG UGCCUC
          UUG   CGU UU  AU AUGGAG
miRNA  3'   U     G  UG  G   U 5'
```

dataset: 1  
**TARGET : mm\_Notch1\_3UTR**  
length: 1628

**MIRNA : mmu-let-7i-5p**

length: 22

mfe: -21.4 kcal/mol

p-value: undefined

**position 178**

```
target 5'      C      AAC      U 3'
              CACAGA  ACUGCCUU
              GUGUUU  UGAUGGAG
miRNA  3' UUGUC      GA      U 5'
```

dataset: 1

**TARGET : mm\_Notch1\_3UTR**

length: 1628

**MIRNA : mmu-let-7i-5p**

length: 22

mfe: -19.0 kcal/mol

p-value: undefined

**position 1004**

```
target 5'      G      G      A      G 3'
              GGUG GGAC  UGCCUU
              UCGU UUUG  AUGGAG
miRNA  3' UUG      G      AUG      U 5'
```

dataset: 1

**TARGET : mm\_Notch1\_3UTR**

length: 1628

**MIRNA : mmu-let-7i-5p**

length: 22

mfe: -18.1 kcal/mol

p-value: undefined

**position 1026**

```
target 5'      U  UG      GUGGGUGGAGC      U 3'
              GC  GAAU      CUGCUUC
              CG  UUUG      GAUGGAG
miRNA  3' UUGU  UG      AU      U 5'
```

dataset: 1

**TARGET : mm\_Notch1\_3UTR**

length: 1628

**MIRNA : mmu-let-7i-5p**

length: 22



mfe: -16.6 kcal/mol  
p-value: undefined

**position 699**

```
target 5' U UG      UU GG G      U 3'
          A GGC C  G  A UACUUC
          U UCG G  U  U AUGGAG
miRNA 3'  UG    U UU GA G      U 5'
```

dataset: 1

**TARGET : mm\_Notch1\_3UTR**

length: 1628

**MIRNA : mmu-let-7i-5p**

length: 22

mfe: -16.3 kcal/mol  
p-value: undefined

**position 39**

```
target 5' A   CCU  UG   G CCUUCC G       G 3'
          AGC   GU  GGA U       A UGCUUCA
          UUG   CG  UUU A       U AUGGAGU
miRNA 3'   U   UG   G       G       5'
```

dataset: 1

**TARGET : mm\_Notch1\_3UTR**

length: 1628

**MIRNA : mmu-let-7i-5p**

length: 22

mfe: -14.7 kcal/mol  
p-value: undefined

**position 345**

```
target 5' U  U  UU  UU   G       U 3'
          GC GU  AU  AUU AUUGCUC
          UG CG  UG  UGA UGAUGGAG
miRNA 3' U  U       UU       U 5'
```

dataset: 1

**TARGET : mm\_Notch1\_3UTR**

length: 1628

**MIRNA : mmu-let-7i-5p**

length: 22

mfe: -14.5 kcal/mol  
p-value: undefined

**position 150**

```
target 5'  U      UU  UAUG      U 3'
           UAGUAU  AUU  UACUUU
           GUCGUG  UGA  AUGGAG
miRNA  3'  UU      UU  UG      U 5'
```

dataset: 1

**TARGET : mm\_Notch1\_3UTR**

length: 1628

**MIRNA : mmu-let-7i-5p**

length: 22

mfe: -10.5 kcal/mol

p-value: undefined

**position 1539**

```
target 5'  A      AUGA  GAUG      U 3'
           GGUA  AAAU  UAUUUU
           UCGU  UUUG  AUGGAG
miRNA  3'  UUG  G      AUG      U 5'
```

dataset: 1

**TARGET : mm\_Notch1\_3UTR**

length: 1628

**MIRNA : mmu-let-7i-5p**

length: 22

mfe: -8.6 kcal/mol

p-value: undefined

**position 197**

```
target 5'  U  UUUAU  UG      C 3'
           UAU  A  UAUUGUUUU
           GUG  U  AUGAUGGAG
miRNA  3'  UUGUC  U  UG      U 5'
```

dataset: 1

**TARGET : mm\_Notch1\_3UTR**

length: 1628

**MIRNA : mmu-let-7i-5p**

length: 22

mfe: -7.6 kcal/mol

p-value: undefined

**position 88**

```
target 5'  A  G  CUUU  AAA      U 3'
           AG AGC  UAAA  UGUUUU
```

UU UCG GUUU AUGGAG  
miRNA 3' G U GAUG U 5'

dataset: 1  
**TARGET : mm\_Notch1\_3UTR**  
length: 1628  
**MIRNA : mmu-let-7i-5p**  
length: 22

mfe: 0.0 kcal/mol  
p-value: undefined

**position 0**  
target 5' 3'

miRNA 3' 5'

dataset: 1  
**TARGET : mm\_Notch1\_3UTR**  
length: 1628  
**MIRNA : mmu-let-7d-5p**  
length: 22

mfe: -23.8 kcal/mol  
p-value: undefined

**position 971**  
target 5' A CUGAUCCCCAAACUG CUGGGUGGGGACA G 3'  
AGCUAUGUGGCCU GC UGCCUU  
UUGAUACGUUGGA UG AUGGAG  
miRNA 3' A 5'

dataset: 1  
**TARGET : mm\_Notch1\_3UTR**  
length: 1628  
**MIRNA : mmu-let-7d-5p**  
length: 22

mfe: -22.9 kcal/mol  
p-value: undefined

**position 766**  
target 5' A C GG G G C 3'  
AGC AUGCAG U UG UGCCUC  
UUG UACGUU G AU AUGGAG  
miRNA 3' A G G A 5'

dataset: 1  
**TARGET : mm\_Notch1\_3UTR**  
length: 1628  
**MIRNA : mmu-let-7d-5p**  
length: 22

mfe: -20.2 kcal/mol  
p-value: undefined

**position 1038**  
target 5' G G G 3'  
GUG AGCC UGCUUCU  
UAC UUGG AUGGAGA  
miRNA 3' UUGA G AUG 5'

dataset: 1  
**TARGET : mm\_Notch1\_3UTR**  
length: 1628  
**MIRNA : mmu-let-7d-5p**  
length: 22

mfe: -19.6 kcal/mol  
p-value: undefined

**position 697**  
target 5' U UGGG G C 3'  
UUAUG GGCCU A UACUUCU  
GAUAC UUGGA U AUGGAGA  
miRNA 3' UU G G 5'

dataset: 1  
**TARGET : mm\_Notch1\_3UTR**  
length: 1628  
**MIRNA : mmu-let-7d-5p**  
length: 22

mfe: -18.6 kcal/mol  
p-value: undefined

**position 160**  
target 5' U CUUUUAUUUUC AGAAAC U 3'  
UUAUGUA AC ACUGCCUUU  
GAUACGU UG UGAUGGAGA  
miRNA 3' UU GA 5'

dataset: 1  
**TARGET : mm\_Notch1\_3UTR**  
length: 1628

**MIRNA : mmu-let-7d-5p**

length: 22

mfe: -17.5 kcal/mol

p-value: undefined

**position 343**

```
target 5'      A      UGUUU      UGAU      U 3'
              AUGC      AUUUUAU      UGCUUCU
              UACG      UGGAUG      AUGGAGA
miRNA  3' UUGA      U      5'
```

dataset: 1

**TARGET : mm\_Notch1\_3UTR**

length: 1628

**MIRNA : mmu-let-7d-5p**

length: 22

mfe: -15.9 kcal/mol

p-value: undefined

**position 43**

```
target 5'      C      U G  GU      UUCC G      A 3'
              CUGU G GA  CCU      A UGCUUC
              GAUA C UU  GGA      U AUGGAG
miRNA  3' UU      G      G      A 5'
```

dataset: 1

**TARGET : mm\_Notch1\_3UTR**

length: 1628

**MIRNA : mmu-let-7d-5p**

length: 22

mfe: -13.5 kcal/mol

p-value: undefined

**position 74**

```
target 5' U      GG      AAAGGAGCCUUU  AAAAA      A 3'
              GCUG  GCGACC      UA      UGUUUUU
              UGAU  CGUUGG      AU      AUGGAGA
miRNA  3' U      A      G      5'
```

dataset: 1

**TARGET : mm\_Notch1\_3UTR**

length: 1628

**MIRNA : mmu-let-7d-5p**

length: 22

mfe: -12.0 kcal/mol  
p-value: undefined

**position 1520**

```
target 5' A      CA      AA      GUAGGUA AUGAAAA  AUG      U 3'
          AACUA  UGCA  ACU          UG      UAUUUUU
          UUGAU  ACGU  UGG          AU      AUGGAGA
miRNA 3'                                     G      5'
```

dataset: 1  
**TARGET : mm\_Notch1\_3UTR**  
length: 1628  
**MIRNA : mmu-let-7d-5p**  
length: 22

mfe: -8.6 kcal/mol  
p-value: undefined

**position 203**

```
target 5'      A      C 3'
          UAUGU      AUUGUUUU
          AUACG      UGAUGGAG
miRNA 3' UUG      UUGGA      A 5'
```

dataset: 1  
**TARGET : mm\_Notch1\_3UTR**  
length: 1628  
**MIRNA : mmu-let-7d-5p**  
length: 22

mfe: 0.0 kcal/mol  
p-value: undefined

**position 0**

```
target 5' 3'
```

```
miRNA 3' 5'
```

dataset: 1  
**TARGET : mm\_Notch1\_3UTR**  
length: 1628  
**MIRNA : mmu-let-7a-5p**  
length: 22

mfe: -20.7 kcal/mol  
p-value: undefined

**position 766**

```
target 5' A C GG G G C 3'
          AGC AUGCAG U UG UGCCUC
          UUG UAUGUU G AU AUGGAG
miRNA 3' A G G U 5'
```

dataset: 1

**TARGET : mm\_Notch1\_3UTR**

length: 1628

**MIRNA : mmu-let-7a-5p**

length: 22

mfe: -18.9 kcal/mol

p-value: undefined

**position 43**

```
target 5' C UG GAGU UUCC G G 3'
          CUGU G CCU A UGCUUCA
          GAUA U GGA U AUGGAGU
miRNA 3' UU UG U G 5'
```

dataset: 1

**TARGET : mm\_Notch1\_3UTR**

length: 1628

**MIRNA : mmu-let-7a-5p**

length: 22

mfe: -18.8 kcal/mol

p-value: undefined

**position 971**

```
target 5' A CUGAUCCCCAAACUG CUGGGUGGGGACA G 3'
          AGCUAUGUGGCCU GC UGCCUU
          UUGAUAUGUUGGA UG AUGGAG
miRNA 3' U 5'
```

dataset: 1

**TARGET : mm\_Notch1\_3UTR**

length: 1628

**MIRNA : mmu-let-7a-5p**

length: 22

mfe: -18.2 kcal/mol

p-value: undefined

**position 179**

```
target 5' C AAA U 3'
          ACAG C ACUGCCUU
```

UGUU   G  UGAUGGAG  
miRNA  3'  UUGAUA   G   A          U  5'

dataset: 1  
**TARGET : mm\_Notch1\_3UTR**  
length: 1628  
**MIRNA : mmu-let-7a-5p**  
length: 22

mfe: -16.9 kcal/mol  
p-value: undefined

**position 1038**  
target 5'      G   G                  U  3'  
              GUG  AGCC   UGCUUC  
              UAU  UUGG   AUGGAG  
miRNA  3'  UUGA   G   AUG          U  5'

dataset: 1  
**TARGET : mm\_Notch1\_3UTR**  
length: 1628  
**MIRNA : mmu-let-7a-5p**  
length: 22

mfe: -16.6 kcal/mol  
p-value: undefined

**position 345**  
target 5'  U      UU          UGAU          U  3'  
          GCUGU   AUUUAU   UGCUUC  
          UGAUA   UGGAUG   AUGGAG  
miRNA  3'  U      UGU                  U  5'

dataset: 1  
**TARGET : mm\_Notch1\_3UTR**  
length: 1628  
**MIRNA : mmu-let-7a-5p**  
length: 22

mfe: -16.5 kcal/mol  
p-value: undefined

**position 697**  
target 5'  U                  UGGG  G          U  3'  
          UUAUG  GGCCU   A  UACUUC  
          GAUAU  UUGGA   U  AUGGAG  
miRNA  3'  UU      G          G          U  5'



dataset: 1  
**TARGET : mm\_Notch1\_3UTR**  
length: 1628  
**MIRNA : mmu-let-7a-5p**  
length: 22

mfe: -12.2 kcal/mol  
p-value: undefined

**position 152**  
target 5'        A        UU            G            U 3'  
                  GUAU    AUUUUAU UACUUU  
                  UAUG    UGGAUG AUGGAG  
miRNA 3' UUGA        U                            U 5'

dataset: 1  
**TARGET : mm\_Notch1\_3UTR**  
length: 1628  
**MIRNA : mmu-let-7a-5p**  
length: 22

mfe: -10.9 kcal/mol  
p-value: undefined

**position 74**  
target 5' U        GG            AAAGGAGCCUUU    AAAAA            U 3'  
                  GCUG    GCGACC                    UA        UGUUUU  
                  UGAU    UGUUGG                    AU        AUGGAG  
miRNA 3' U        A                            G                            U 5'

dataset: 1  
**TARGET : mm\_Notch1\_3UTR**  
length: 1628  
**MIRNA : mmu-let-7a-5p**  
length: 22

mfe: -10.2 kcal/mol  
p-value: undefined

**position 1532**  
target 5' A            GG        GA AAUGAUG            U 3'  
                  AACUGUA    UAAU    A            UAUUUU  
                  UUGAUAU    GUUG    U            AUGGAG  
miRNA 3'                            GA G                            U 5'

dataset: 1  
**TARGET : mm\_Notch1\_3UTR**  
length: 1628

**MIRNA : mmu-let-7a-5p**

length: 22

mfe: -8.8 kcal/mol

p-value: undefined

**position 196**

```
target 5'  U      UUAU  G              C 3'
           UUAU      AU UAUUGUUUU
           GAUA      UG AUGAUGGAG
miRNA  3'  UU      UGU   G              U 5'
```

dataset: 1

**TARGET : mm\_Notch1\_3UTR**

length: 1628

**MIRNA : mmu-let-7a-5p**

length: 22

mfe: -6.6 kcal/mol

p-value: undefined

**position 170**

```
target 5'              N              C 3'
                        UUAUUUU
                        GAUGGAG
miRNA  3'  UUGAUAUGUUGGAU          U 5'
```

dataset: 1

**TARGET : mm\_Notch1\_3UTR**

length: 1628

**MIRNA : mmu-let-7a-5p**

length: 22

mfe: 0.0 kcal/mol

p-value: undefined

**position 0**

```
target 5'  3'
```

```
miRNA  3'  5'
```

dataset: 1

**TARGET : mm\_Notch1\_3UTR**

length: 1628

**MIRNA : mmu-let-7b-5p**

length: 22

mfe: -26.2 kcal/mol  
p-value: undefined

**position 766**

```
target 5' A           GG G  G           C 3'  
          AGCCAUGCAG  U UG UGCCUC  
          UUGGUGUGUU  G AU AUGGAG  
miRNA  3'           G  G           U 5'
```

dataset: 1

**TARGET : mm\_Notch1\_3UTR**

length: 1628

**MIRNA : mmu-let-7b-5p**

length: 22

mfe: -24.1 kcal/mol  
p-value: undefined

**position 177**

```
target 5'  U      G  AC           U 3'  
          CCACA AA  ACUGCCUU  
          GGUGU UU  UGAUGGAG  
miRNA  3' UU      G  GGA           U 5'
```

dataset: 1

**TARGET : mm\_Notch1\_3UTR**

length: 1628

**MIRNA : mmu-let-7b-5p**

length: 22

mfe: -19.7 kcal/mol  
p-value: undefined

**position 991**

```
target 5'  C  A  U      GGGUGGGG  A      G 3'  
          CCA AC GGCCU      AC UGCCUU  
          GGU UG UUGGA      UG AUGGAG  
miRNA  3' UU  G           U 5'
```

dataset: 1

**TARGET : mm\_Notch1\_3UTR**

length: 1628

**MIRNA : mmu-let-7b-5p**

length: 22

mfe: -17.2 kcal/mol  
p-value: undefined

**position 39**

```
target 5' A      CUG UG GAGU      UUCC G          G 3'
          AGCC  U  G      CCU      A UGCUUCA
          UUGG  G  U      GGA      U AUGGAGU
miRNA 3'      U      UG U          G          5'
```

dataset: 1

**TARGET : mm\_Notch1\_3UTR**

length: 1628

**MIRNA : mmu-let-7b-5p**

length: 22

mfe: -16.1 kcal/mol

p-value: undefined

**position 702**

```
target 5'          G      UGGG G      U 3'
          GGCCU      A UACUUC
          UUGGA      U AUGGAG
miRNA 3' UUGGUGUG          G      U 5'
```

dataset: 1

**TARGET : mm\_Notch1\_3UTR**

length: 1628

**MIRNA : mmu-let-7b-5p**

length: 22

mfe: -15.9 kcal/mol

p-value: undefined

**position 1022**

```
target 5' A UG      UG  AUGUGGGUGGAGC          U 3'
          G  UGC  GA          CUGCUUC
          U  GUG  UU          GAUGGAG
miRNA 3'  UG      UG  GGAU          U 5'
```

dataset: 1

**TARGET : mm\_Notch1\_3UTR**

length: 1628

**MIRNA : mmu-let-7b-5p**

length: 22

mfe: -13.7 kcal/mol

p-value: undefined

**position 330**

```
target 5'  U      AUUGUAA UG  GUUUAUUUAUUG          U 3'
          UCAUG          A  CU          AUUGCUUC
```

miRNA 3' UU GGUGU G U GA UGAUGGAG U 5'

dataset: 1  
**TARGET : mm\_Notch1\_3UTR**  
length: 1628  
**MIRNA : mmu-let-7b-5p**  
length: 22

mfe: -13.0 kcal/mol  
p-value: undefined

**position 82**  
target 5' C AA G UUUAAAAAA U 3'  
GACCA G AGCCU UGUUUU  
UUGGU U UUGGA AUGGAG  
miRNA 3' G G UG U 5'

dataset: 1  
**TARGET : mm\_Notch1\_3UTR**  
length: 1628  
**MIRNA : mmu-let-7b-5p**  
length: 22

mfe: -12.3 kcal/mol  
p-value: undefined

**position 1520**  
target 5' A GCAA GUAGGUA AUGAAAA AUG U 3'  
AACUACAU AACU UG UAUUUU  
UUGGUGUG UUGG AU AUGGAG  
miRNA 3' G U 5'

dataset: 1  
**TARGET : mm\_Notch1\_3UTR**  
length: 1628  
**MIRNA : mmu-let-7b-5p**  
length: 22

mfe: -11.7 kcal/mol  
p-value: undefined

**position 137**  
target 5' U UUUUUUUUUU GU UUAUG U 3'  
CCAU A AUUUAU UACUUU  
GGUG U UGGAUG AUGGAG  
miRNA 3' UU GU U 5'

dataset: 1  
**TARGET : mm\_Notch1\_3UTR**  
length: 1628  
**MIRNA : mmu-let-7b-5p**  
length: 22

mfe: -8.7 kcal/mol  
p-value: undefined

**position 196**  
target 5' U UUAU G C 3'  
UUAU AU UAUUGUUUU  
GGUG UG AUGAUGGAG  
miRNA 3' UU UGU G U 5'

dataset: 1  
**TARGET : mm\_Notch1\_3UTR**  
length: 1628  
**MIRNA : mmu-let-7b-5p**  
length: 22

mfe: 0.0 kcal/mol  
p-value: undefined

**position 0**  
target 5' 3'

miRNA 3' 5'

dataset: 1  
**TARGET : mm\_Notch1\_3UTR**  
length: 1628  
**MIRNA : mmu-let-7c-5p**  
length: 22

mfe: -27.2 kcal/mol  
p-value: undefined

**position 766**  
target 5' A GG G G C 3'  
AGCCAUGCAG U UG UGCCUC  
UUGGUAUGUU G AU AUGGAG  
miRNA 3' G G U 5'

dataset: 1  
**TARGET : mm\_Notch1\_3UTR**  
length: 1628

**MIRNA : mmu-let-7c-5p**

length: 22

mfe: -19.7 kcal/mol

p-value: undefined

**position 991**

```
target 5'  C   A  U      GGGUGGGG  A      G 3'
           CCA AC GGCCU      AC UGCCUU
           GGU UG UUGGA      UG AUGGAG
miRNA  3'  UU   A                                U 5'
```

dataset: 1

**TARGET : mm\_Notch1\_3UTR**

length: 1628

**MIRNA : mmu-let-7c-5p**

length: 22

mfe: -18.8 kcal/mol

p-value: undefined

**position 39**

```
target 5'  A      CU  UG GAGU  UUCC G      G 3'
           AGCC  GU  G      CCU   A UGCUUCA
           UUGG  UA  U      GGA   U AUGGAGU
miRNA  3'                UG U                G                5'
```

dataset: 1

**TARGET : mm\_Notch1\_3UTR**

length: 1628

**MIRNA : mmu-let-7c-5p**

length: 22

mfe: -18.4 kcal/mol

p-value: undefined

**position 177**

```
target 5'  U   CAGA                                U 3'
           CCA   AAC  ACUGCCUU
           GGU   UUG  UGAUGGAG
miRNA  3'  UU   AUG   GA                U 5'
```

dataset: 1

**TARGET : mm\_Notch1\_3UTR**

length: 1628

**MIRNA : mmu-let-7c-5p**

length: 22

mfe: -16.9 kcal/mol  
p-value: undefined

**position 1038**

```
target 5'      G   G                               U 3'
              GUG AGCC   UGCUUC
              UAU UUGG   AUGGAG
miRNA  3' UUGG   G   AUG           U 5'
```

dataset: 1

**TARGET : mm\_Notch1\_3UTR**

length: 1628

**MIRNA : mmu-let-7c-5p**

length: 22

mfe: -16.1 kcal/mol  
p-value: undefined

**position 702**

```
target 5'      G   UGGG G           U 3'
              GGCCU   A UACUUC
              UUGGA   U AUGGAG
miRNA  3' UUGGUAUG           G   U 5'
```

dataset: 1

**TARGET : mm\_Notch1\_3UTR**

length: 1628

**MIRNA : mmu-let-7c-5p**

length: 22

mfe: -15.3 kcal/mol  
p-value: undefined

**position 345**

```
target 5' U   UU   UGAU           U 3'
              GCUGU   AUUUUUAU   UGCUUC
              UGGUA   UGGAUG   AUGGAG
miRNA  3' U   UGU           U 5'
```

dataset: 1

**TARGET : mm\_Notch1\_3UTR**

length: 1628

**MIRNA : mmu-let-7c-5p**

length: 22

mfe: -12.3 kcal/mol  
p-value: undefined



**position 82**

```
target 5' C      AA G      UUUAAAAAA      U 3'
          GACCA  G AGCCU      UGUUUU
          UUGGU  U UUGGA      AUGGAG
miRNA 3'      A  G      UG      U 5'
```

dataset: 1

**TARGET : mm\_Notch1\_3UTR**

length: 1628

**MIRNA : mmu-let-7c-5p**

length: 22

mfe: -12.2 kcal/mol

p-value: undefined

**position 152**

```
target 5'      A      UU      G      U 3'
          GUAU  AUUUAU UACUUU
          UAUG  UGGAUG AUGGAG
miRNA 3' UUGG      U      U 5'
```

dataset: 1

**TARGET : mm\_Notch1\_3UTR**

length: 1628

**MIRNA : mmu-let-7c-5p**

length: 22

mfe: -10.6 kcal/mol

p-value: undefined

**position 1525**

```
target 5'      A      AA      GUAGGUA AUGAAAA      AUG      U 3'
          CAUGCA  ACU      UG      UAUUUU
          GUAUGU  UGG      AU      AUGGAG
miRNA 3' UUG      G      U 5'
```

dataset: 1

**TARGET : mm\_Notch1\_3UTR**

length: 1628

**MIRNA : mmu-let-7c-5p**

length: 22

mfe: -8.6 kcal/mol

p-value: undefined

**position 201**

```
target 5'      U      UG      C 3'
          UAUU  U AUUGUUUU
```

AUGU G UGAUGGAG  
miRNA 3' UUGGU UG A U 5'

dataset: 1  
**TARGET : mm\_Notch1\_3UTR**  
length: 1628  
**MIRNA : mmu-let-7c-5p**  
length: 22

mfe: 0.0 kcal/mol  
p-value: undefined

**position 0**  
target 5' 3'

miRNA 3' 5'

dataset: 1  
**TARGET : mm\_Notch1\_3UTR**  
length: 1628  
**MIRNA : mmu-let-7e-5p**  
length: 22

mfe: -20.3 kcal/mol  
p-value: undefined

**position 43**  
target 5' C UG GAGU CCAG G 3'  
CUGU G CCUUU UGCUUCA  
GAUA U GGAGG AUGGAGU  
miRNA 3' UU UG U 5'

dataset: 1  
**TARGET : mm\_Notch1\_3UTR**  
length: 1628  
**MIRNA : mmu-let-7e-5p**  
length: 22

mfe: -19.3 kcal/mol  
p-value: undefined

**position 1026**  
target 5' U GA UG GGGUGGAG U 3'  
GCUG A U CCUGCUUC  
UGAU U G GGAUGGAG  
miRNA 3' U AUG UG A U 5'

dataset: 1  
**TARGET : mm\_Notch1\_3UTR**  
length: 1628  
**MIRNA : mmu-let-7e-5p**  
length: 22

mfe: -18.7 kcal/mol  
p-value: undefined

**position 971**

```
target 5' A          UGAUCCCCAAACUGG CUGGGUGGGGACA          G 3'
          AGCUAUGUGGCCUC          C          UGCCUU
          UUGAUAUGUUGGAG          G          AUGGAG
miRNA 3'                                     U 5'
```

dataset: 1  
**TARGET : mm\_Notch1\_3UTR**  
length: 1628  
**MIRNA : mmu-let-7e-5p**  
length: 22

mfe: -17.9 kcal/mol  
p-value: undefined

**position 766**

```
target 5' A    C    GG G GG    C 3'
          AGC AUGCAG  U U  UGCCUC
          UUG UAUGUU  A G  AUGGAG
miRNA 3'    A    GG G    U 5'
```

dataset: 1  
**TARGET : mm\_Notch1\_3UTR**  
length: 1628  
**MIRNA : mmu-let-7e-5p**  
length: 22

mfe: -17.3 kcal/mol  
p-value: undefined

**position 179**

```
target 5'          C    AAACA          U 3'
          ACAG          CUGCCUU
          UGUU          GAUGGAG
miRNA 3' UUGAUA    GGAG          U 5'
```

dataset: 1  
**TARGET : mm\_Notch1\_3UTR**  
length: 1628

**MIRNA : mmu-let-7e-5p**

length: 22

mfe: -16.4 kcal/mol

p-value: undefined

**position 697**

```
target 5'  U          GGGAG          U 3'
          UUAUG GGCCUU          UACUUC
          GAUAU UUGGAG          AUGGAG
miRNA  3'  UU          G          G          U 5'
```

dataset: 1

**TARGET : mm\_Notch1\_3UTR**

length: 1628

**MIRNA : mmu-let-7e-5p**

length: 22

mfe: -15.7 kcal/mol

p-value: undefined

**position 345**

```
target 5'  U          UU          AUUGA          U 3'
          GCUGU          AUUU          UUGCUUC
          UGAUA          UGGA          GAUGGAG
miRNA  3'  U          UGU          G          U 5'
```

dataset: 1

**TARGET : mm\_Notch1\_3UTR**

length: 1628

**MIRNA : mmu-let-7e-5p**

length: 22

mfe: -12.5 kcal/mol

p-value: undefined

**position 74**

```
target 5'  U          GG          AAAGGAG  UUUUAAAAAA          U 3'
          GCUG  GCGACC          CC          UGUUUU
          UGAU  UGUUGG          GG          AUGGAG
miRNA  3'  U          A          A          U 5'
```

dataset: 1

**TARGET : mm\_Notch1\_3UTR**

length: 1628

**MIRNA : mmu-let-7e-5p**

length: 22

mfe: -12.5 kcal/mol  
p-value: undefined

**position 160**

```
target 5'   U       UA                               C 3'
           UUAUG       CUUUUAUUUU
           GAUAU       GAGGAUGGAG
miRNA  3'  UU       GUUG                               U 5'
```

dataset: 1

**TARGET : mm\_Notch1\_3UTR**

length: 1628

**MIRNA : mmu-let-7e-5p**

length: 22

mfe: -11.4 kcal/mol  
p-value: undefined

**position 1532**

```
target 5'  A           GGUAAUGAA   GA G           U 3'
           AACUGUA           AAU  U UAUUUU
           UUGAUAU           UUG  G AUGGAG
miRNA  3'           G           GA G           U 5'
```

dataset: 1

**TARGET : mm\_Notch1\_3UTR**

length: 1628

**MIRNA : mmu-let-7e-5p**

length: 22

mfe: -6.9 kcal/mol  
p-value: undefined

**position 201**

```
target 5'           U       UG A                               C 3'
           UAU A  U  UUGUUUU
           AUGU  G  GAUGGAG
miRNA  3'  UUGAU       UG AG                               U 5'
```
